# Supplementary material
Source: PubMed Central journal article supplement (PMC5543910)
Supplement: jciinsight-2-94278-s001.pdf [file jciinsight-2-94278-s001.pdf]

SUPPLEMENTARY MATERIALS

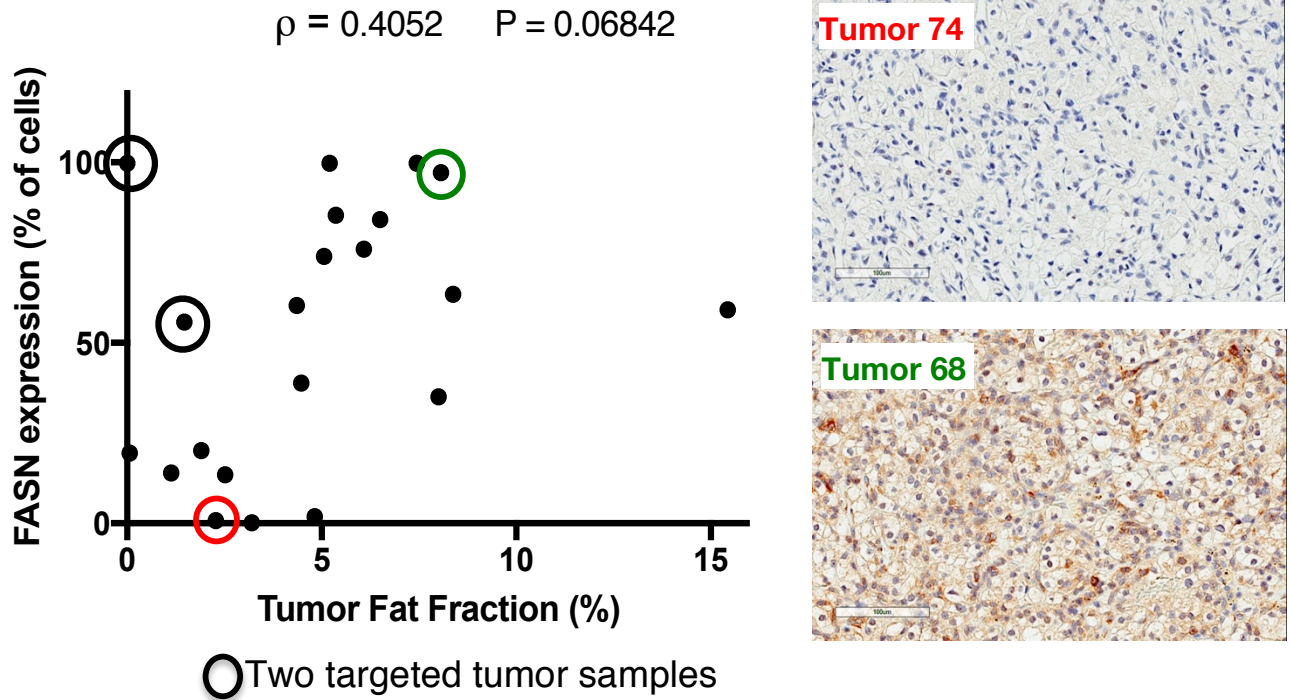

**Fig. S1: Fat fraction correlation with fatty acid synthase (FASN) staining indicates a positive trend towards significance.** Graph shows the correlation between fat fraction values and FASN expression (measured as percentage of cells exhibiting positive staining on FASN immunohistochemistry [IHC]) in 21 ccRCC targeted tumor samples. The Spearman correlation values are indicated in the graph. The red circle indicates a tumor that has low FF values and corresponding low levels of FASN expression (top right, IHC of tumor 74), and the green circle indicates the tumor that has high FF values and corresponding high levels of FASN staining (bottom right, IHC of tumor 68). The black circles indicate two outlier samples with low FF values and high FASN levels from the same ccRCC tumor, as explained in results and discussion. The scale bar indicates 100  $\mu$ m.

**Fig S2. Flow Chart of Study Participants**

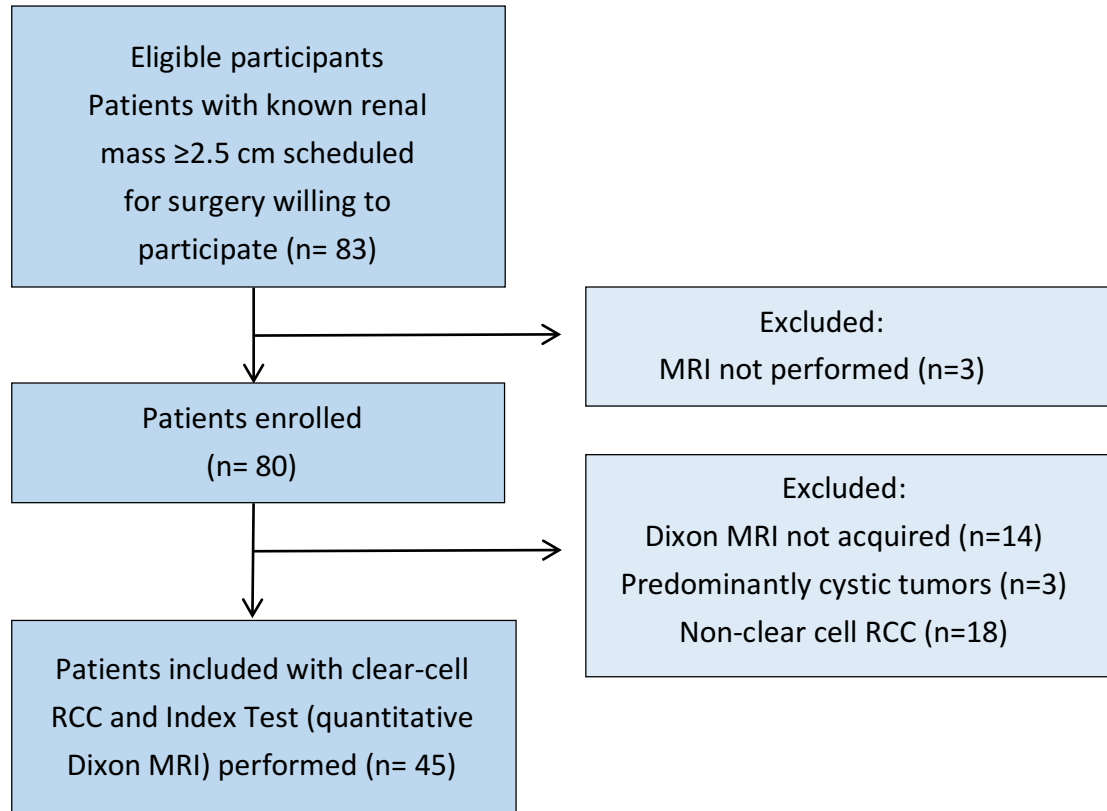

**Supp Table S1: Patient and tumor characteristics**

| Characteristic     | No. of Patients | %    | Tumor Size (cm) |
|--------------------|-----------------|------|-----------------|
| <b>Age (years)</b> | 58.2 ± 11.6     |      |                 |
| <b>Gender</b>      |                 |      |                 |
| <b>M</b>           | 36              | 80   |                 |
| <b>F</b>           | 9               | 20   |                 |
| <b>T Stage</b>     |                 |      |                 |
| <b>I</b>           | 27              | 60   |                 |
| <b>II</b>          | 0               | 0    |                 |
| <b>III</b>         | 17              | 37.8 |                 |
| <b>IV</b>          | 1               | 2.2  |                 |
| <b>ISUP Grade</b>  |                 |      |                 |
| <b>1</b>           | 0               | 0    | 0               |
| <b>2</b>           | 19              | 42   | 4 ± 2           |
| <b>3</b>           | 22              | 49   | 6 ± 2.4         |
| <b>4</b>           | 4               | 9    | 11 ± 4          |
| <b>Treatment</b>   |                 |      |                 |
| <b>RPN</b>         | 26              | 58   |                 |
| <b>LRN</b>         | 7               | 15   |                 |
| <b>OPN</b>         | 3               | 7.0  |                 |
| <b>ORN</b>         | 8               | 18   |                 |
| <b>LSN</b>         | 1               | 2    |                 |
| <b>Histology</b>   |                 |      |                 |
| <b>Clear cell</b>  | 45              | 100  | 5.5 ± 3         |
| <b>Necrosis</b>    | 14              | 32.6 |                 |
| <b>Sarcomatoid</b> | 2               | 4.7  |                 |

Note: Data are means ± standard deviations. ISUP = International Society of Urological Pathology

RPN = robotic partial nephrectomy LRN = laparoscopic radical nephrectomy

LSN = laparoscopic simple nephrectomy OPN = open partial nephrectomy

ORN = open radical nephrectomy.

**Supp Table S2: Characteristics of tumors used for Oil Red O staining**

(22 patients, 27 tumor samples)

| Characteristic                           | No. of Patients | %     | Tumor Size (cm) |
|------------------------------------------|-----------------|-------|-----------------|
| <b>Average Age (years): 57.32 ± 10.4</b> |                 |       |                 |
| <b>Gender</b>                            |                 |       |                 |
| <b>M</b>                                 | 17              | 77.3  |                 |
| <b>F</b>                                 | 5               | 22.7  |                 |
| <b>ISUP Grade</b>                        |                 |       |                 |
| <b>1</b>                                 | 0               | 0     | 0               |
| <b>2</b>                                 | 10*             | 45.5  | 3.69 ± 1.45     |
| <b>3</b>                                 | 10              | 45.5  | 6.1 ± 2.54      |
| <b>4</b>                                 | 2               | 9.1   | 12.65 ± 5.16    |
| <b>Treatment</b>                         |                 |       |                 |
| <b>RPN</b>                               | 15              | 68.2  |                 |
| <b>LRN</b>                               | 2               | 9.1   |                 |
| <b>OPN</b>                               | 0               | 0.0   |                 |
| <b>ORN</b>                               | 4               | 18.2  |                 |
| <b>LSN</b>                               | 1               | 4.5   |                 |
| <b>Histology</b>                         |                 |       |                 |
| <b>Clear cell</b>                        | 22              | 100.0 | 5.6 ± 3.4       |
| <b>Necrosis</b>                          | 6               | 27.3  | 8.11 ± 5.62     |
| <b>Sarcomatoid</b>                       | 2               | 4.7   | 12.65 ± 5.16    |

Note: Data are means ± standard deviations. ISUP = International Society of Urological Pathology. \* One tumor showed 5% grade 3 features

RPN = robotic partial nephrectomy LRN = laparoscopic radical nephrectomy

LSN = laparoscopic simple nephrectomy OPN = open partial nephrectomy

ORN = open radical nephrectomy.

**Supp Table S3.** Tabulation of the lipid species identified by mass spectrometric analysis as described in materials and methods. The total number of lipid molecules in each lipid class is represented.

| <b>Lipid Type</b>      | <b>Lipid Classes</b>                  | <b>No. of species</b> |
|------------------------|---------------------------------------|-----------------------|
| Neutral Lipids         | Cholesterol ester (CE)                | 27                    |
|                        | Monoacylglycerol (MAG)                | 2                     |
|                        | Diacylglycerol (DAG)                  | 153                   |
|                        | Triacylglycerol (TAG)                 | 495                   |
| Phospholipids          | Lysophosphatidylcholine (LysoPC)      | 18                    |
|                        | Lysophosphatidylethanolamine (LysoPE) | 7                     |
|                        | Phosphatidylcholine (PC)              | 320                   |
|                        | Phosphatidylethanolamine (PE)         | 105                   |
|                        | Phosphatidylserine (PS)               | 171                   |
|                        | Phosphatidic acid (PA)                | 74                    |
|                        | Phosphatidylinositol (PI)             | 78                    |
|                        | Phosphatidylglycerol (PG)             | 207                   |
|                        | Sphingolipids                         | Sphingomyelin (SM)    |
| Ceramide (Cer)         |                                       | 21                    |
| Hexo Ceramide (HexCer) |                                       | 51                    |
| Polar Lipids           | Cardiolipin (CL)                      | 3                     |
|                        | Free Fatty acids (FFA)                | 25                    |
|                        | <b>Total</b>                          | <b>1759</b>           |
